# Supplementary material for: Genome-Wide mRNA Expression Analysis of Hepatic Adaptation to High-Fat Diets Reveals Switch from an Inflammatory to Steatotic Transcriptional Program
Source: PubMed Central journal article supplement (PMC2722023; doi:10.1371/journal.pone.0006646), 2009-08-14

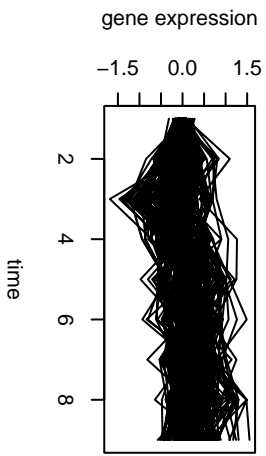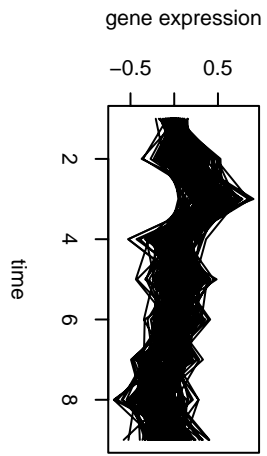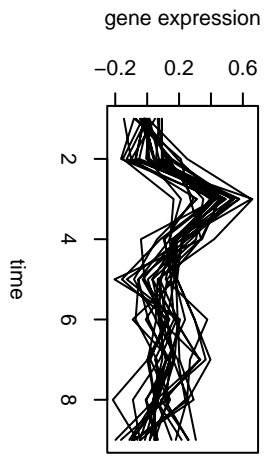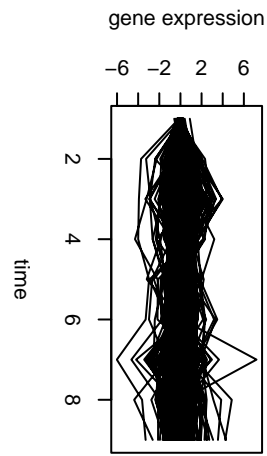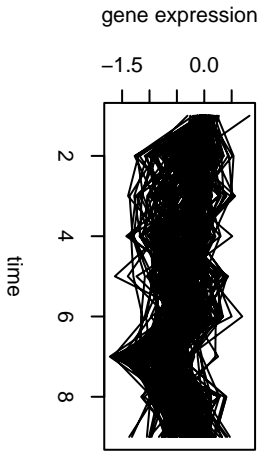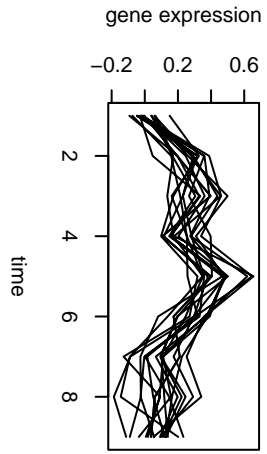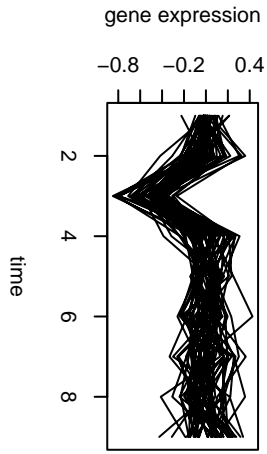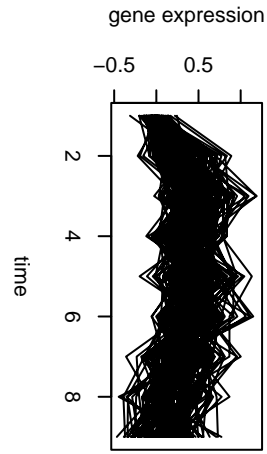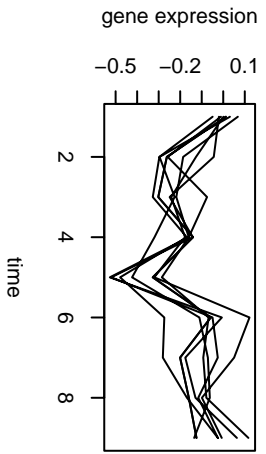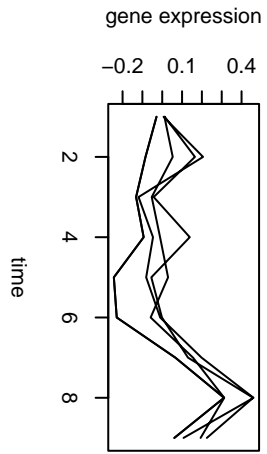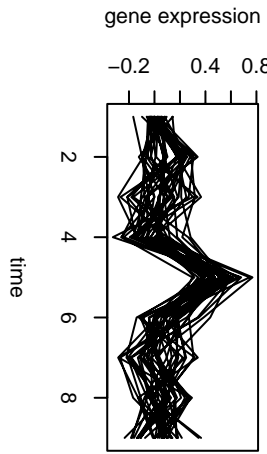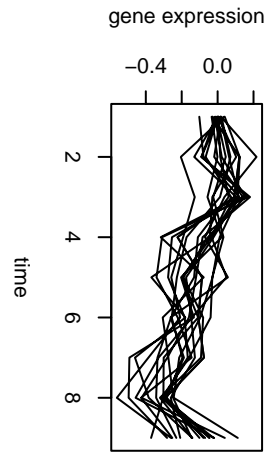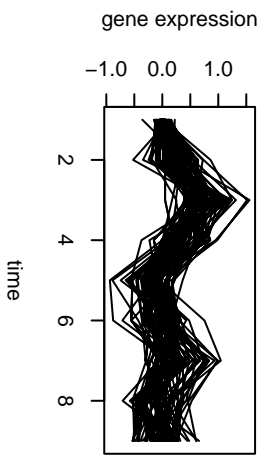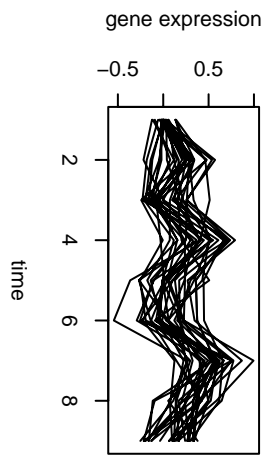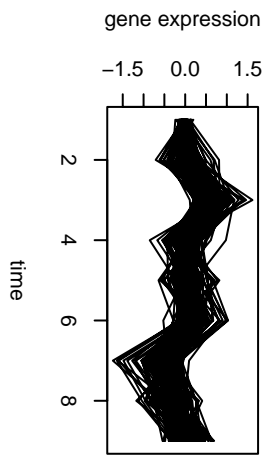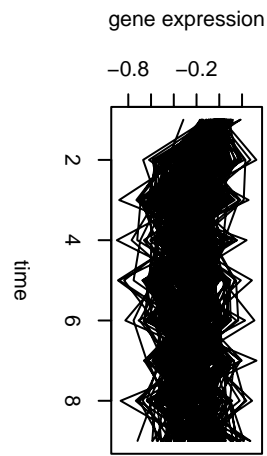

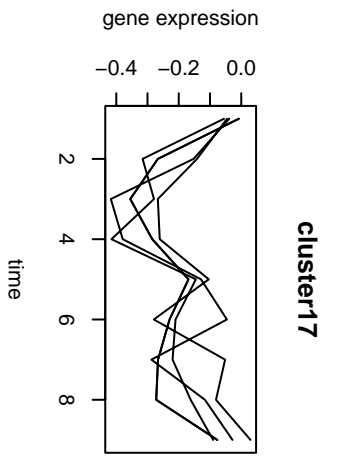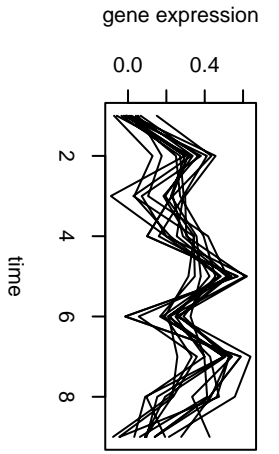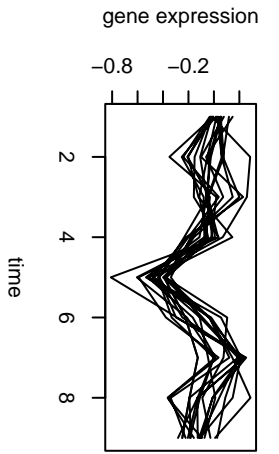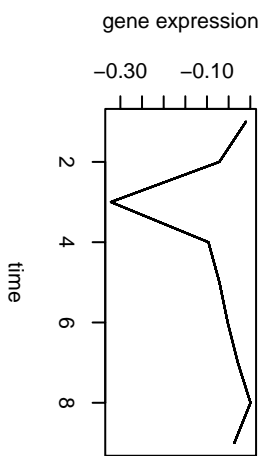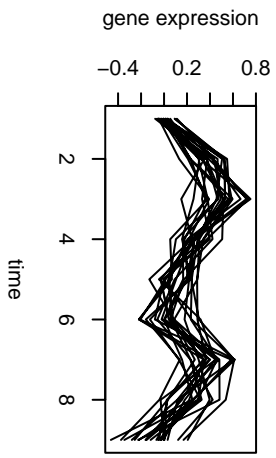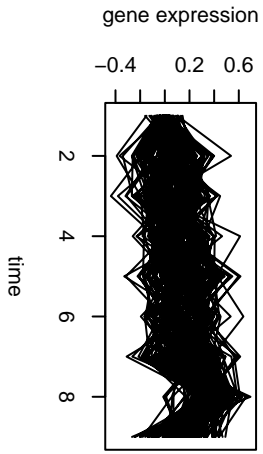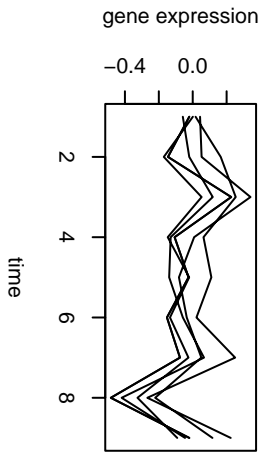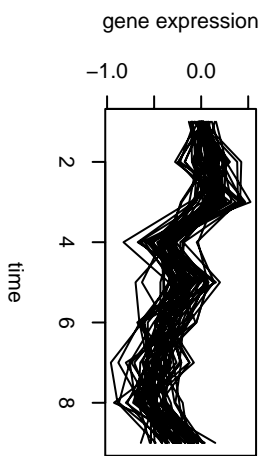

Supplement: pone.0006646.s002.pdf [file pone.0006646.s002.pdf]
