# Supplementary material for: Genome-Wide mRNA Expression Analysis of Hepatic Adaptation to High-Fat Diets Reveals Switch from an Inflammatory to Steatotic Transcriptional Program
Source: PubMed Central journal article supplement (PMC2722023; doi:10.1371/journal.pone.0006646), 2009-08-14

cluster3

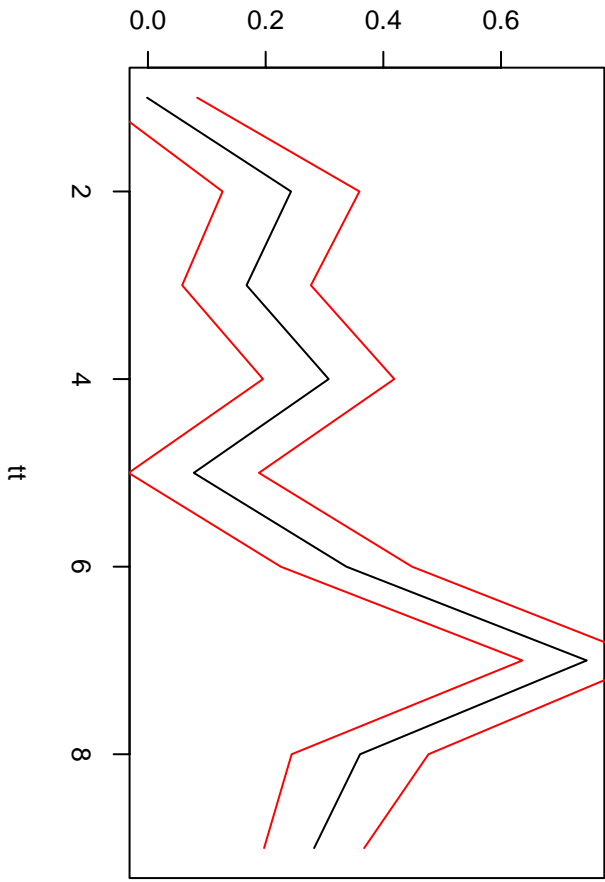

cluster1

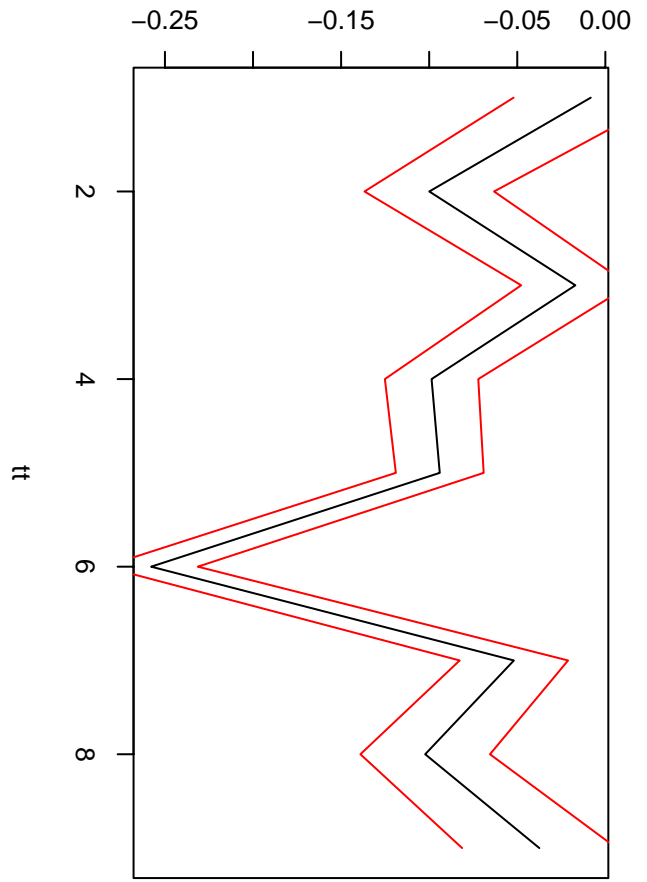

cluster4

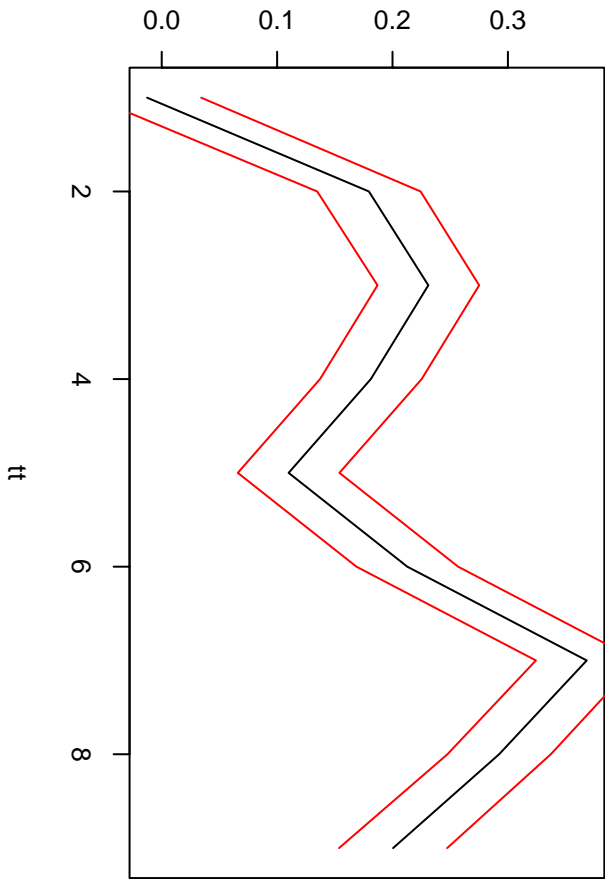

cluster2

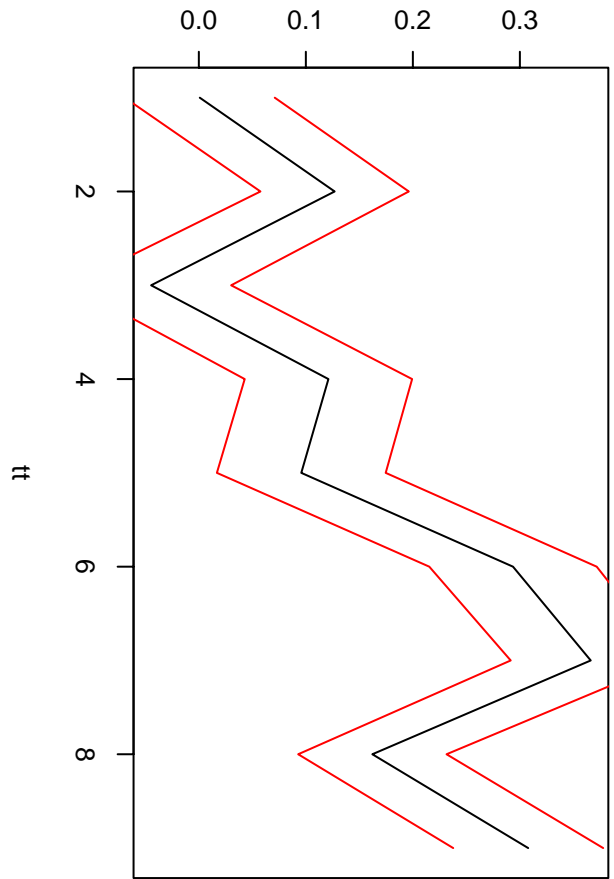

cluster7

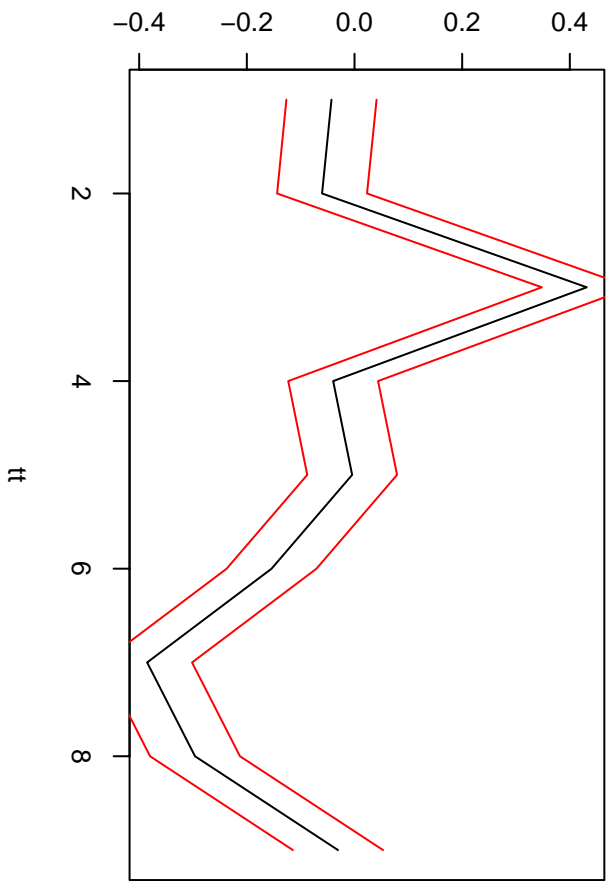

cluster5

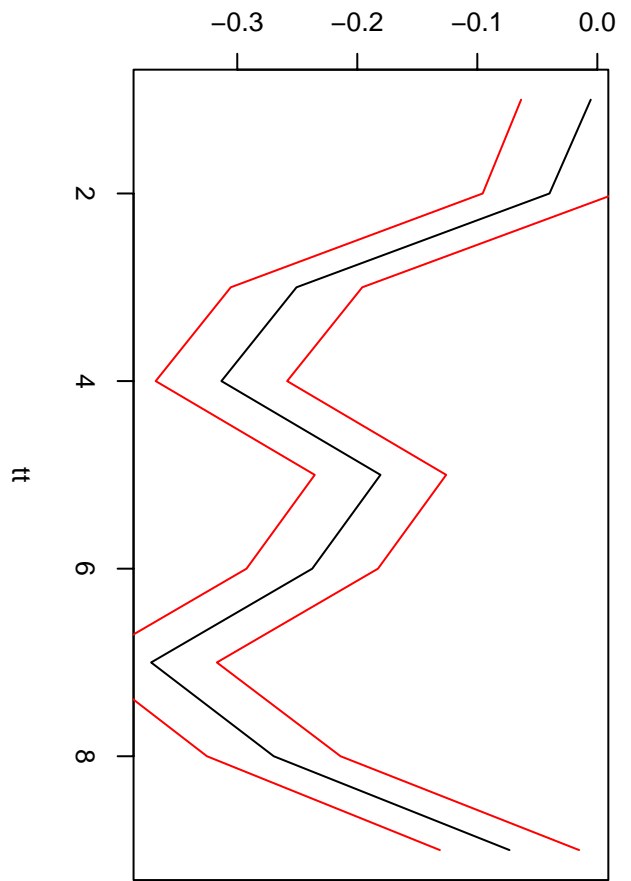

cluster8

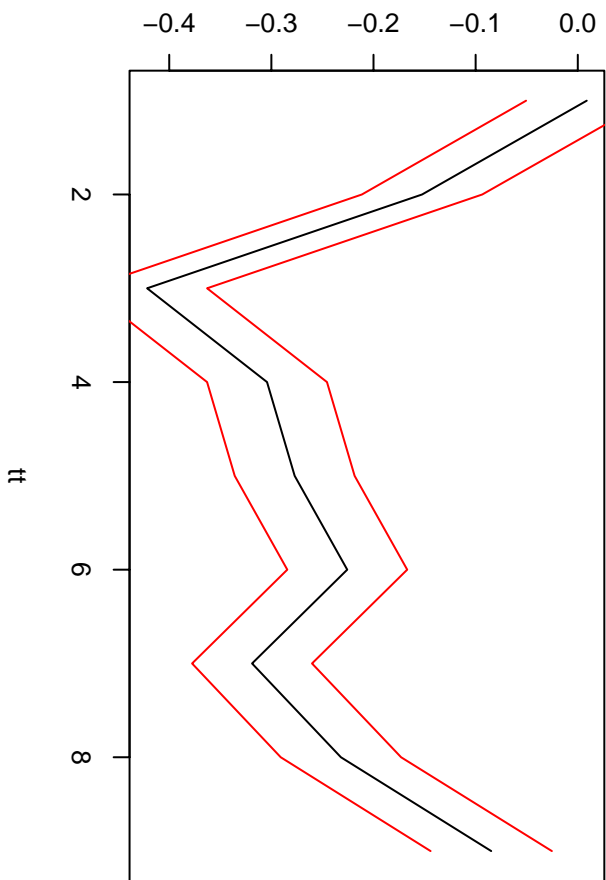

cluster6

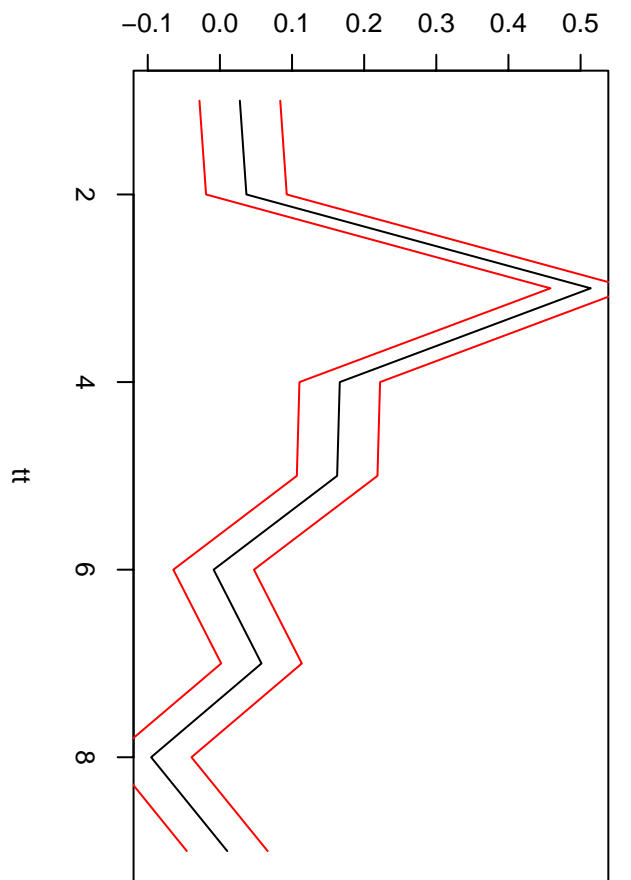

cluster11

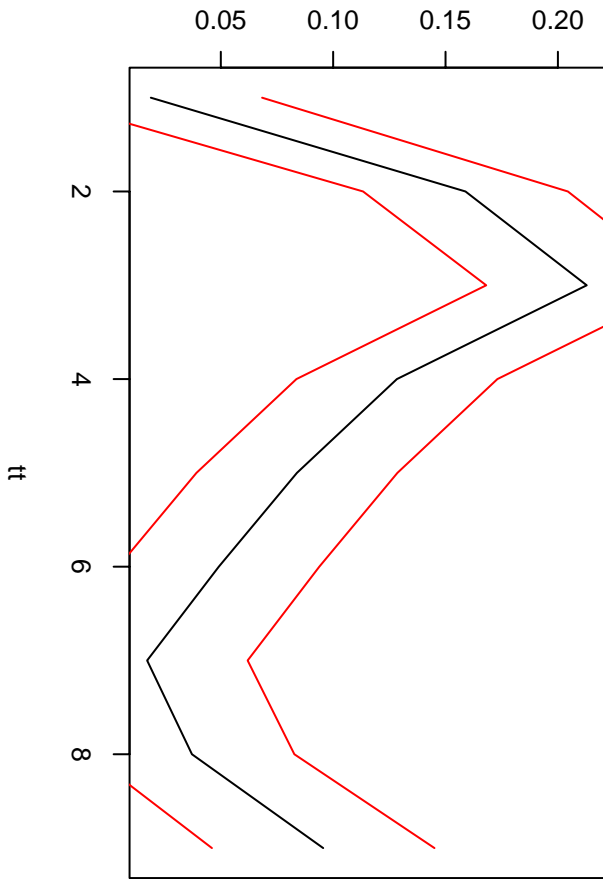

cluster9

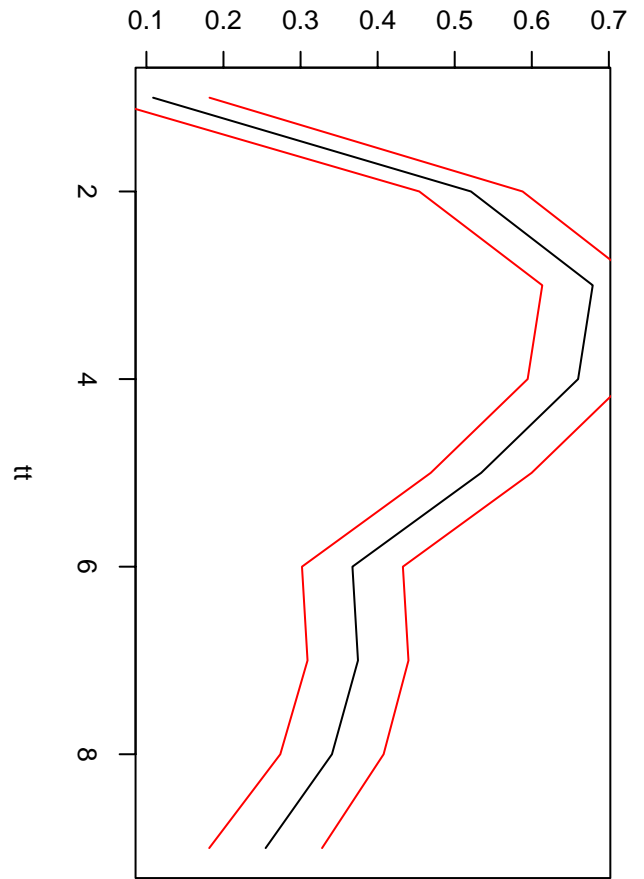

cluster12

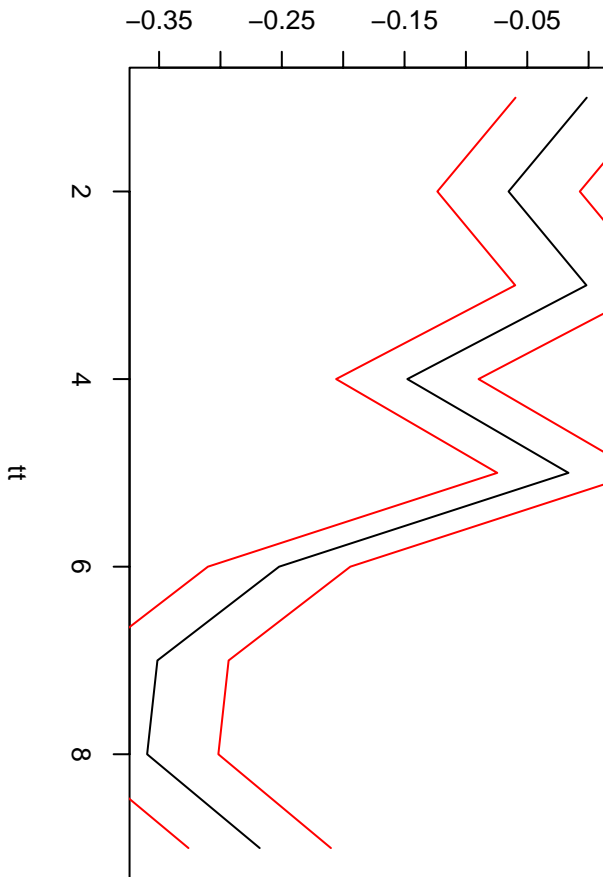

cluster10

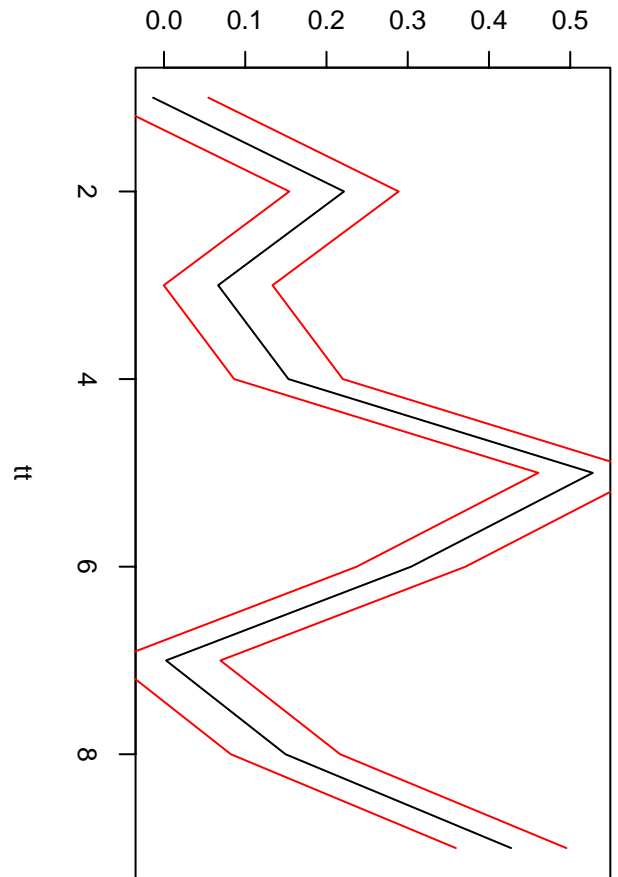

cluster15

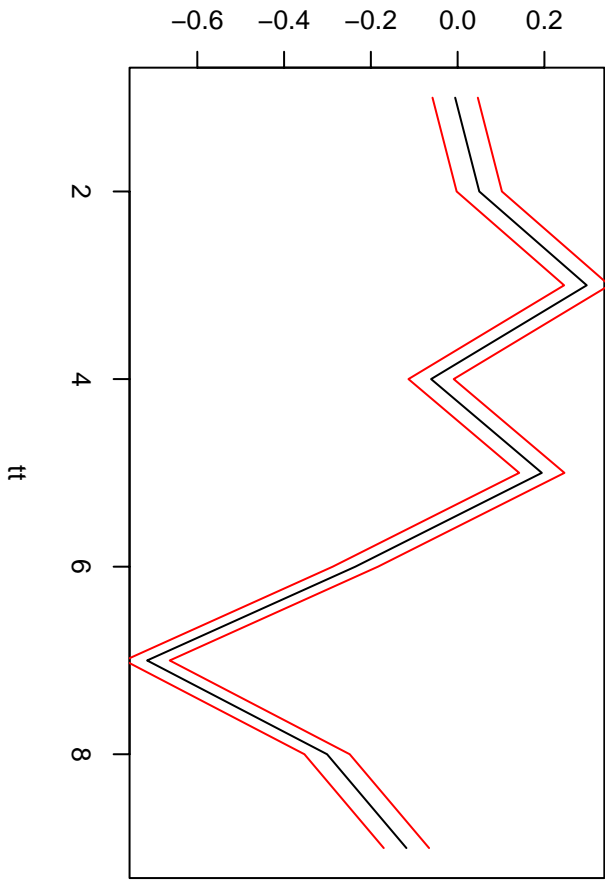

cluster13

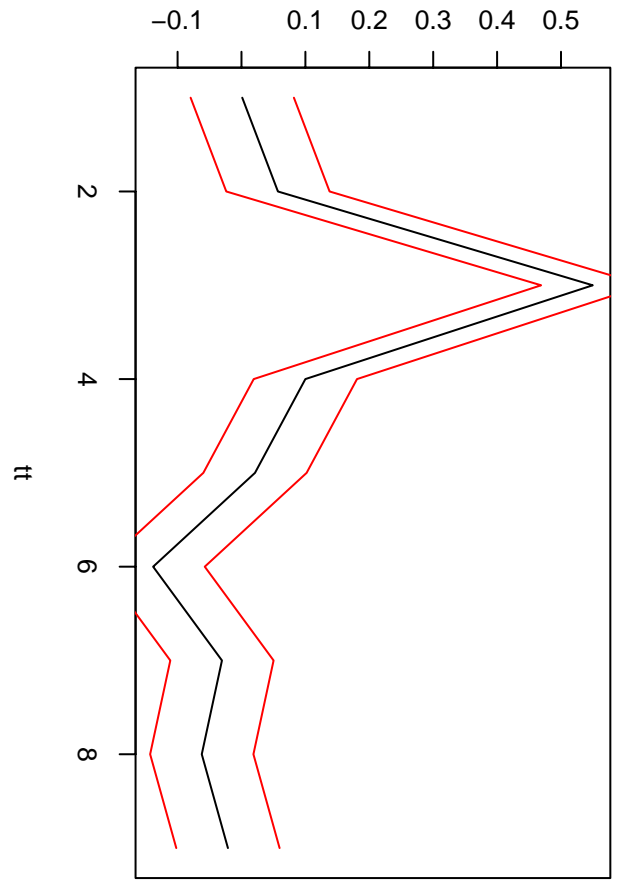

cluster16

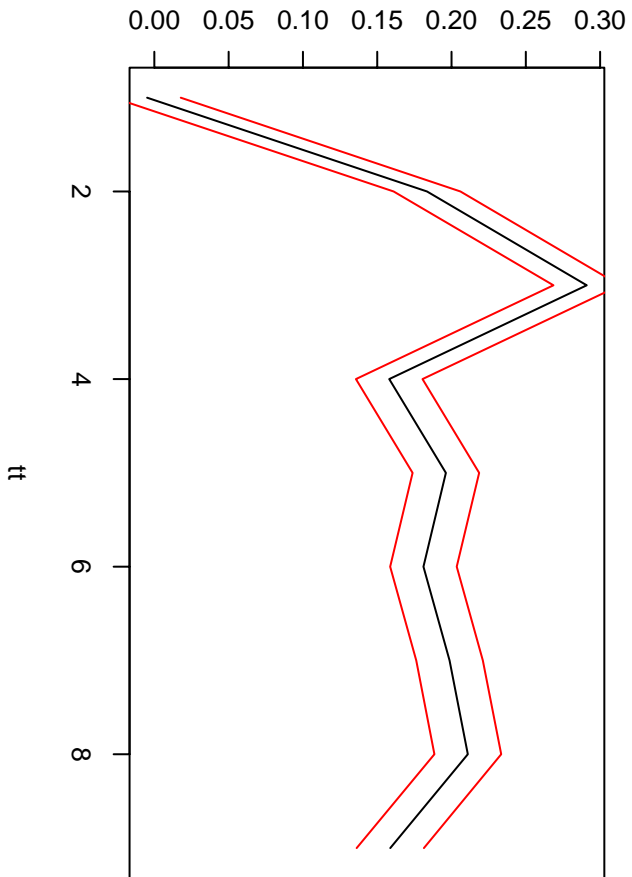

cluster14

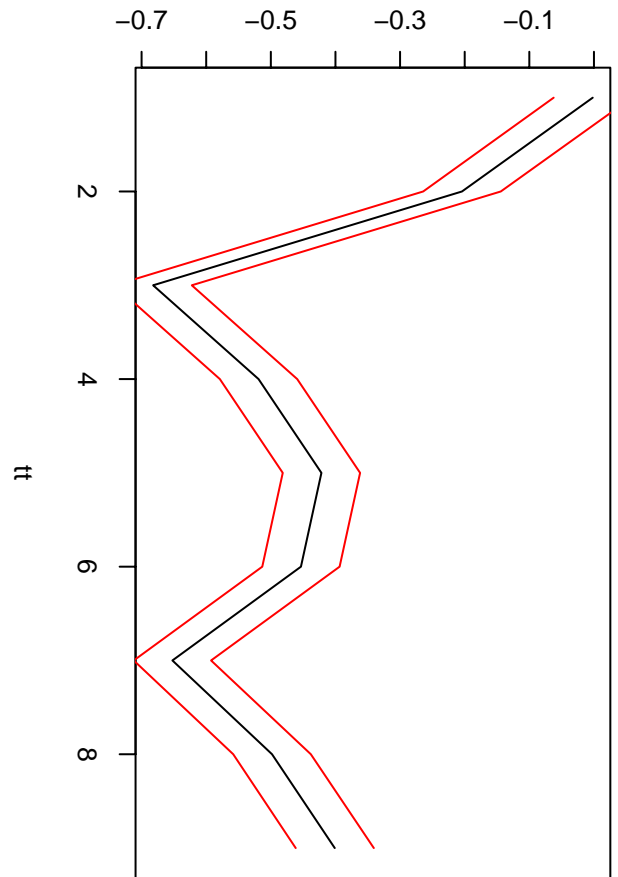

cluster19

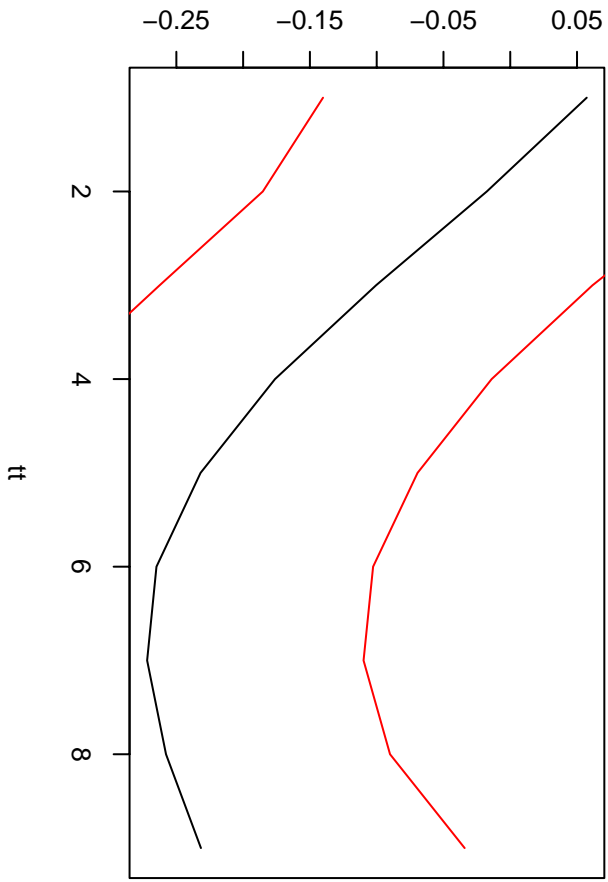

cluster17

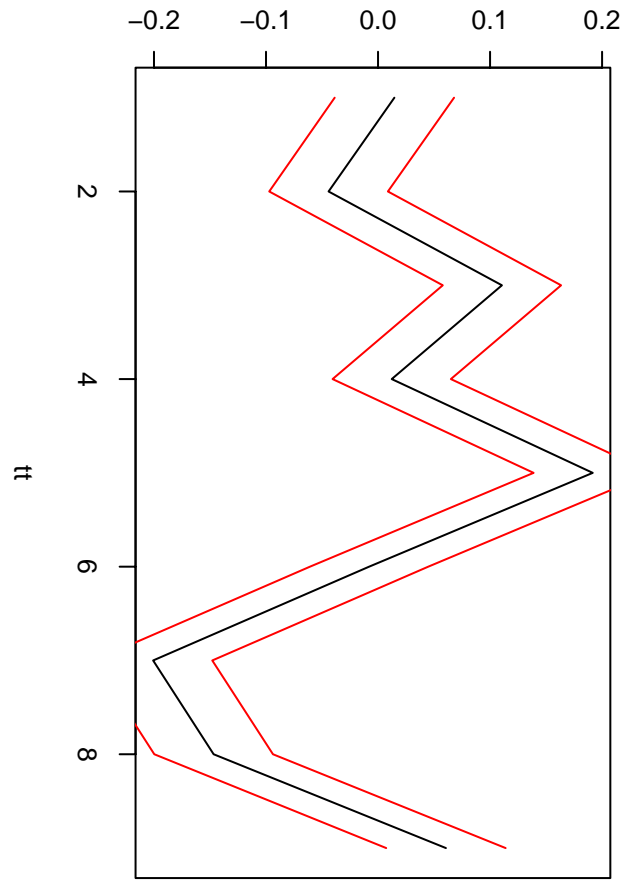

cluster20

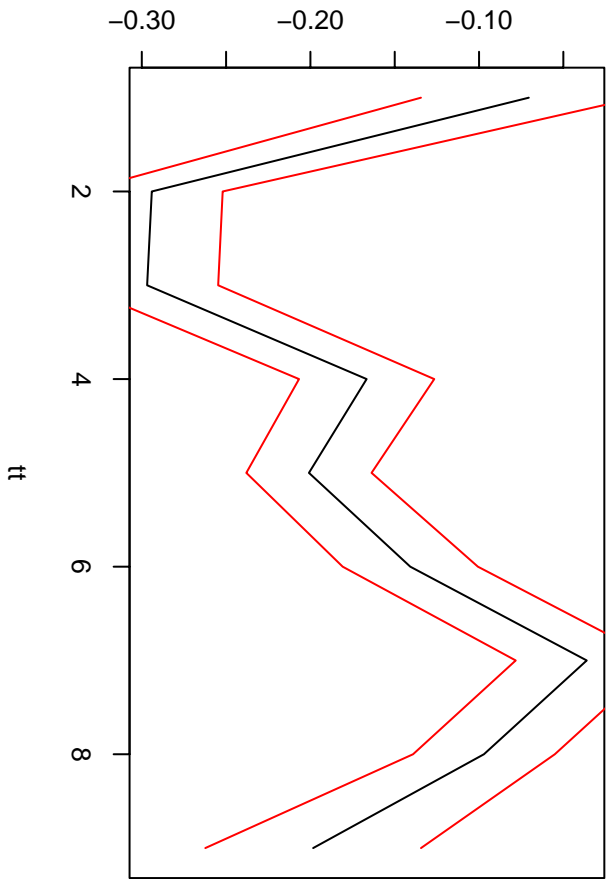

cluster18

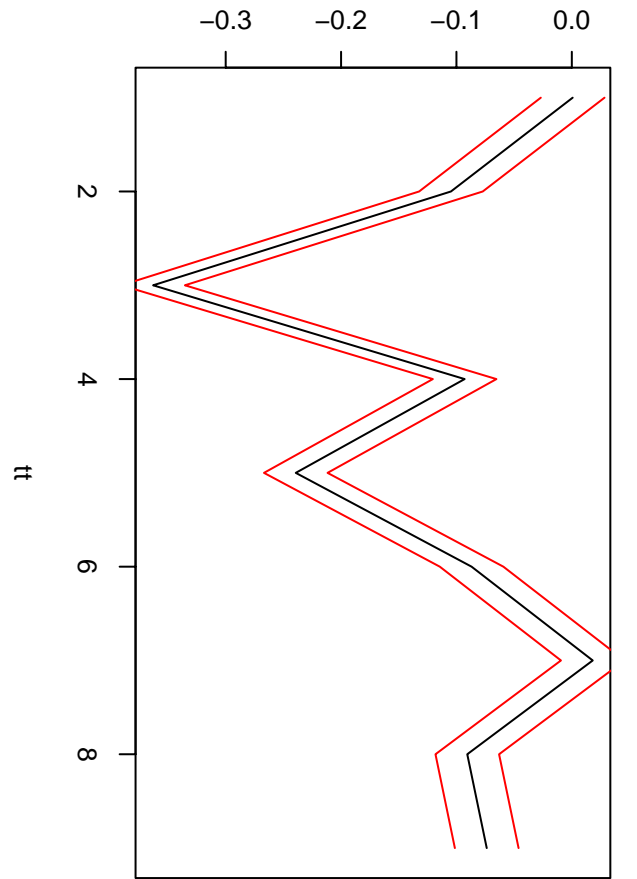

cluster23

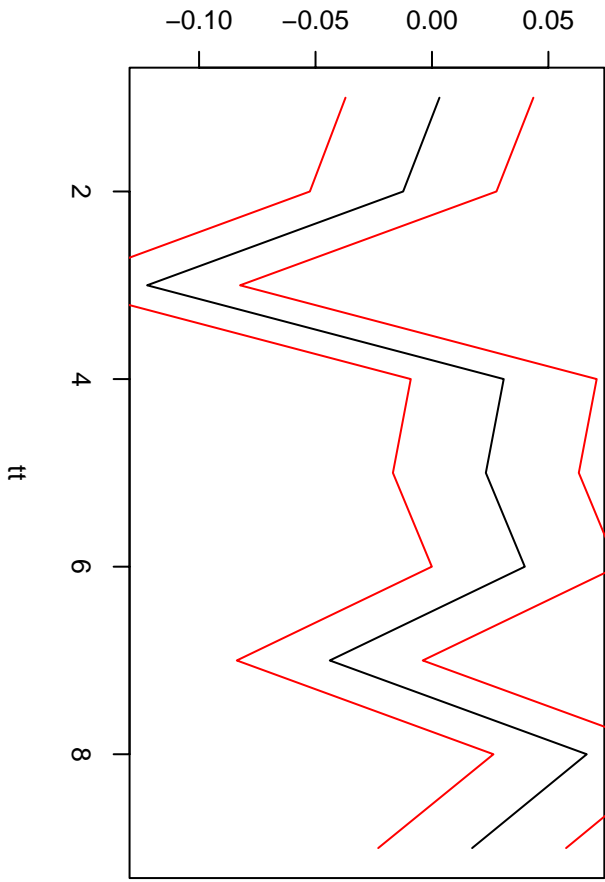

cluster21

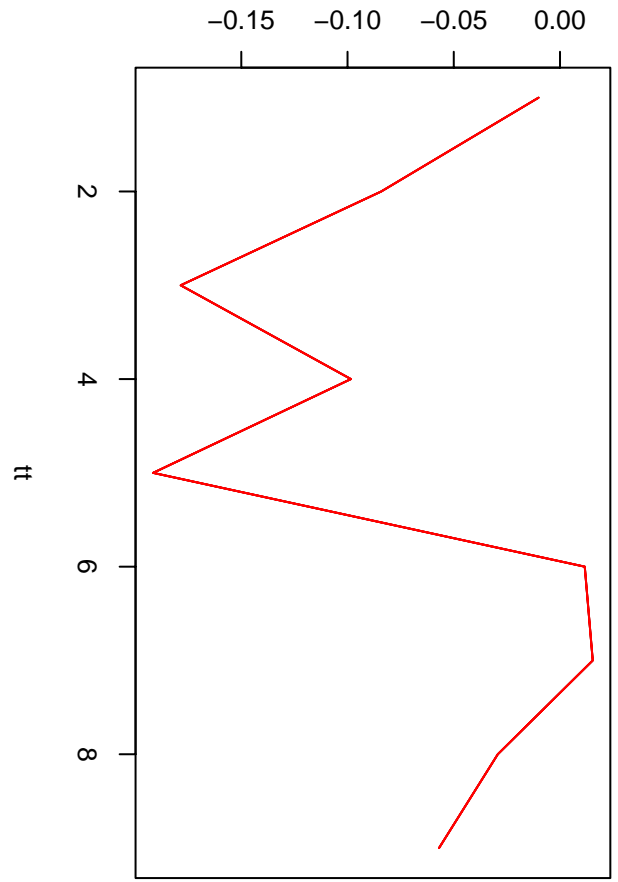

cluster24

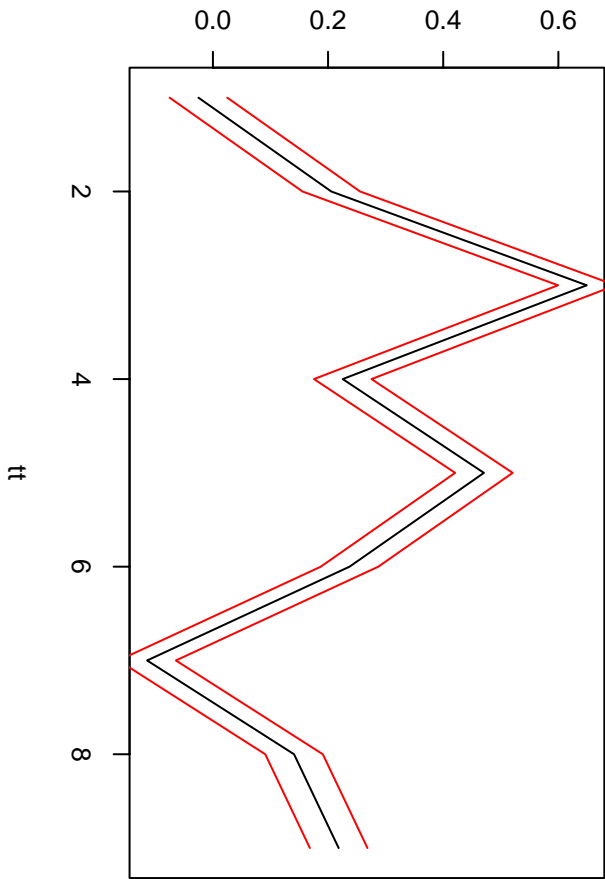

cluster22

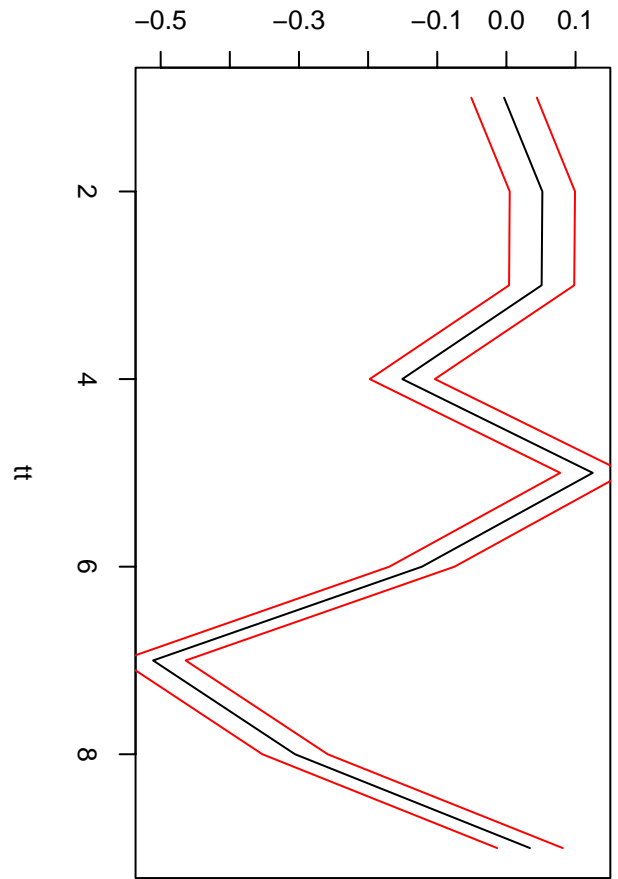

Supplement: pone.0006646.s005.pdf [file pone.0006646.s005.pdf]
