# Supplementary material for: Genome-Wide mRNA Expression Analysis of Hepatic Adaptation to High-Fat Diets Reveals Switch from an Inflammatory to Steatotic Transcriptional Program
Source: PubMed Central journal article supplement (PMC2722023; doi:10.1371/journal.pone.0006646), 2009-08-14

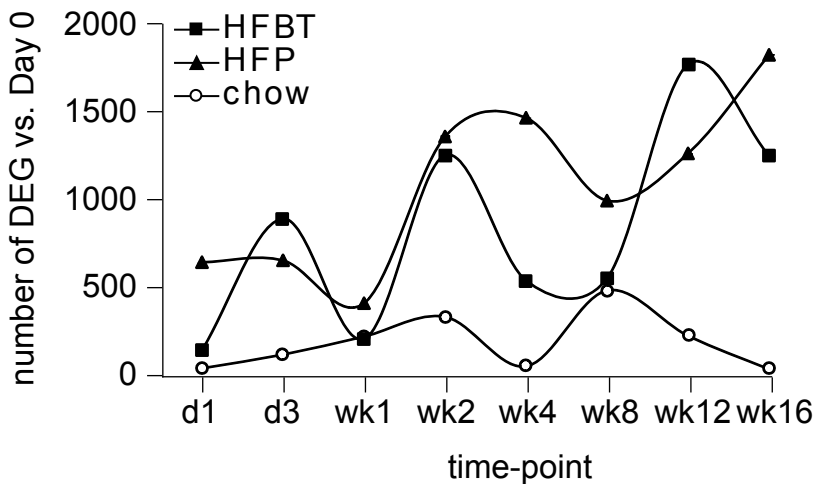

|                              | HFBT vs. chow Day 0 | HFP vs. chow Day 0 | chow vs. chow Day0 |
|------------------------------|---------------------|--------------------|--------------------|
| Day 1                        | 110                 | 626                | 6                  |
| Day 3                        | 886                 | 637                | 86                 |
| Week 1                       | 176                 | 383                | 191                |
| Week 2                       | 1260                | 1371               | 306                |
| Week 4                       | 520                 | 1482               | 18                 |
| Week 8                       | 534                 | 991                | 460                |
| Week12                       | 1796                | 1271               | 195                |
| Week 16                      | 1258                | 1855               | 1                  |
| Total number of unique genes | 3027                | 3316               | 839                |

### Overlap of significant genes (total) in each of 3 diets

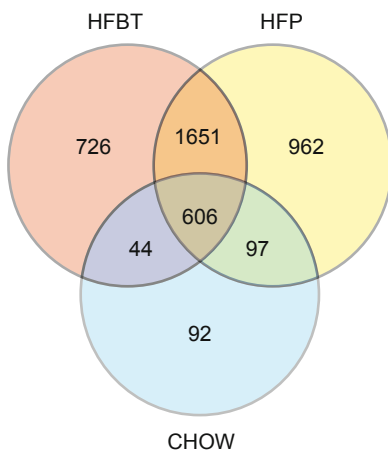

Supplement: pone.0006646.s001.pdf [file pone.0006646.s001.pdf]
